# Supplementary material for: A novel bismuth hydroxide (Bi(OH)3) semiconductor with highly-efficient photocatalytic activity
Source: Royal Society of Chemistry journal article supplement (doi:10.1039/d2cc03369k), 2022-01-01
Supplement: d2cc03369k1.pdf [file d2cc03369k1.pdf]

## ***Supporting information***

# **A novel Bismuth hydroxide (Bi(OH)<sub>3</sub>) semiconductor with efficient photocatalytic activity†**

Sitong Liu<sup>a</sup>, Guangmin Ren<sup>a</sup>, Xinyu Gao<sup>a</sup>, Zizhen Li<sup>a</sup>, Liang Wang<sup>a</sup> and Xiangchao

Meng<sup>a,\*</sup>

<sup>a</sup> Key Laboratory of Marine Chemistry Theory and Technology, Ministry of Education,

College of Chemistry and Chemical Engineering, Ocean University of China, Qingdao,

266100, China.

\*Corresponding Author: [mengxiangchao@ouc.edu.cn](mailto:mengxiangchao@ouc.edu.cn)

**Number of pages: 27**

**Number of figures: 17**

**Number of Tables: 2**

### **Table of Contents**

|                                       |     |
|---------------------------------------|-----|
| <b>S1. Experimental section</b> ..... | S2  |
| <b>S2. Figures</b> .....              | S6  |
| <b>S3. Table</b> .....                | S23 |
| <b>S4. Reference</b> .....            | S27 |

## **S1. Experimental part**

### ***S1.1. Preparation of Bi(OH)<sub>3</sub>***

The Bi(OH)<sub>3</sub> were successfully synthesized through a simple one-step hydrothermal method. In a typical process, 1 mmol Bi(NO<sub>3</sub>)<sub>3</sub>·5H<sub>2</sub>O was dispersed in 30 mL deionized water under ultrasonication. Then, the pH of the suspension was adjusted to 4, 7, 10, 12 and 14 by adding 10 M KOH. After stirring for 1 h at ambient temperature, the suspension was transferred into 100 mL Teflon-lined stainless-steel autoclaves and maintained at 150 °C for 12 h. The white precipitate was collected by centrifugation, rinsed thoroughly with deionized water, and dried at 80 °C for 12 h.

### ***S1.2. Characterization***

X-ray diffraction (XRD) patterns were recorded on an Ultima IV X-ray diffraction with Cu-K $\alpha$  radiation. Scanning electron microscopy (SEM) was performed with a Thermo Scientific ESCALAB Xi+ system. Ultraviolet-visible (UV-vis) diffuse reflectance spectra (DRS) of samples and the absorption spectra of phenol were analyzed by a Hitachi UV-3150 spectrometer. The elemental composition of samples was carried out using X-ray photoelectron spectra (XPS) on a Thermo Scientific ESCALAB Xi+ system with Mono AlK $\alpha$  radiation ( $h\nu = 1486.6$  eV). Thermogravimetric (TG) measurements were carried out on STA6000 Thermogravimetry Analyzer. The CO<sub>2</sub> adsorption capacity of the catalysts was determined by by temperature-programmed desorption of CO<sub>2</sub>-TPD (AutoChem1 II 2920). Before TPD experiments, the samples were plugged with helium at 250 °C for 60 min in order to remove any contaminations.

After cleaning, the samples were cooled and saturated for 20 min in flow of pure at 50 °C. Then, the samples were purged in helium flow until a constant baseline level was attained. TPD measurements were performed from 50 °C to 300 °C at a rate of 10 °C/min using helium as carrier flow. The evolved CO<sub>2</sub> were detected by an on-line TCD calibrated by the peak area of known pulses of CO<sub>2</sub>. The TOC change was analyzed by a Shimadzu TOC-L. The CO<sub>2</sub> adsorption capacity of the catalysts was determined by by temperature-programmed desorption of CO<sub>2</sub>-TPD (AutoChem1 II 2920). Before TPD experiments, the samples were plugged with helium at 250 °C for 60 min in order to remove any contaminations. After cleaning, the samples were cooled and saturated for 20 min in flow of pure at 50 °C. Then, the samples were purged in helium flow until a constant baseline level was attained. TPD measurements were performed under 300 °C at a rate of 10 °C/min using helium as carrier flow. The evolved CO<sub>2</sub> were detected by an on-line TCD calibrated by the peak area of known pulses of CO<sub>2</sub>.

### ***S1.3. Photocatalytic CO<sub>2</sub> conversion***

Photocatalytic reactions were conducted in a closed circulating system (CEL-SPH2N-D9, Beijing China Education Au-Light Co., Ltd.) irradiated with a 300 W Xenon lamp. Herein, 20 mg of catalyst was uniformly dispersed in 50-mL deionized water in the quartz glass reactor. Then, the photoreactor system needed a thorough vacuum treatment, and CO<sub>2</sub> gas of high purity introduced into the circulation system. During 6 h of reaction, the amount of product was analyzed using on-line gas chromatography (GC-7920, Beijing China Education Au-Light Co., Ltd.) equipped with an FID detector.

#### ***S1.4 Photocatalytic degradation***

The degradation activity was evaluated by measuring the degradation of phenol. 50 mg (0.5 g/L) catalyst was added into 100 mL aqueous solution of 10 mg/L of phenol, RhB and MB. After stirring for 30 min in the dark to obtain an adsorption-desorption equilibrium, the system was tested under 300 W Xenon light. Aliquots were drawn and analyzed using a UV-vis spectrometer (Hitachi UV-3150 spectrometer) at the maximum absorption wavelength (269 nm of phenol, 554 nm of RhB and 664 nm of MB) at every certain minute after centrifuging.

#### ***S1.5 Photocatalytic H<sub>2</sub> production reaction***

For photocatalytic H<sub>2</sub> production, 50 mg of Bi(OH)<sub>3</sub> catalyst was dispersed in 90 mL deionized water and 10 mL methanol. Evacuation of the reaction system to remove other gases. A 300 W Xe lamp was used as light source (Perfect Light, Beijing). The collected gaseous products were detected by GC using a thermal conductivity detector (TCD).

#### ***S1.6 Electrochemical measurements***

The photoelectrochemical measurements were carried out in a three-electrode cell on CHI 660E electrochemical workstation. A saturated calomel electrode and platinum electrode were used as the reference electrode and the counter electrode, respectively. FTO conductive glasses coated with prepared samples were used as working electrode. Specifically: samples (5 mg) were dissolved in ethylene glycol (100  $\mu$ L) with Nafion 117 solution (50  $\mu$ L) and ultrasonically dispersed to form a homogeneous suspension,

then it was drop-coated to the FTO conductive glass with the area of  $1 \times 1 \text{ cm}^2$  and airing dried it.

The electrochemical impedance spectra (EIS) were tested at the frequency varied between 105 to 0.1 Hz with 5 mV amplitude. The ON-OFF photo-induced transient current was measured at a bias voltage of 0.4 V, irradiated by 300 W Xe lamp.

## S2. Results

### S2.1 XRD patterns

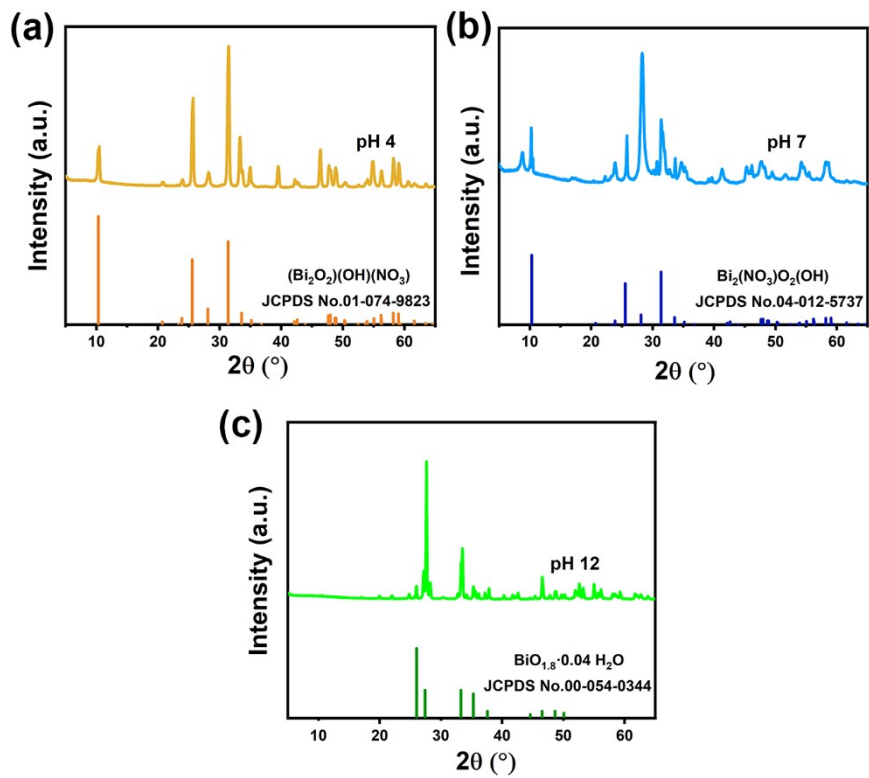

Fig. S1 XRD patterns of sample at pH 4, pH 7 and pH 12.

## S2.2 SEM and XRD spectra

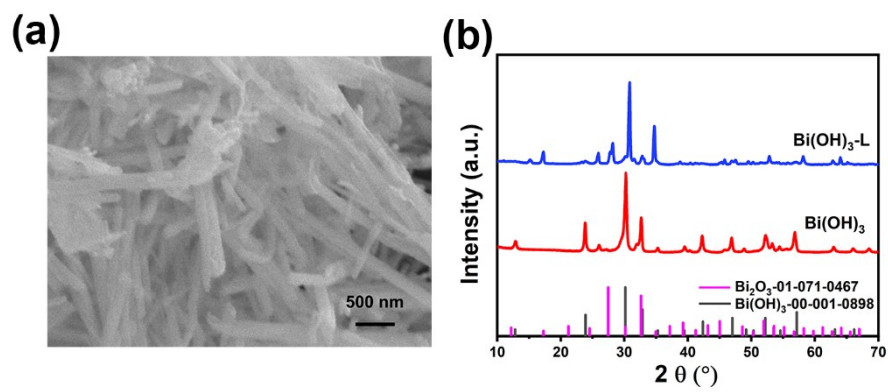

Fig. S2 (a) SEM image and (b) XRD patterns of Bi(OH)<sub>3</sub> after illumination.

*S2.3 EPR spectra*

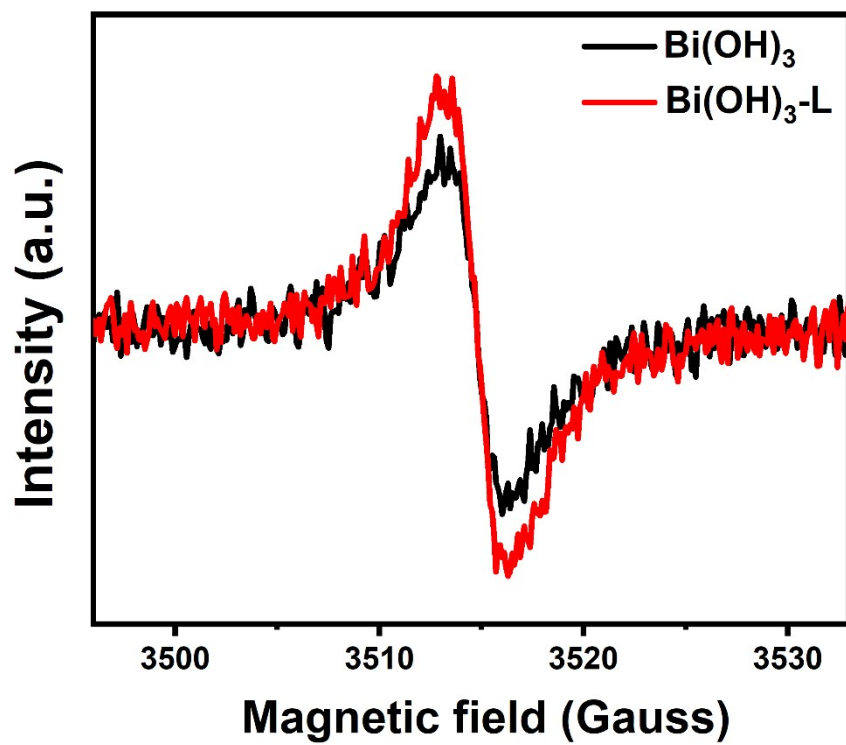

*Fig. S3 EPR spectra of  $\text{Bi(OH)}_3$  before and after illumination.*



S2.4 DRS spectra

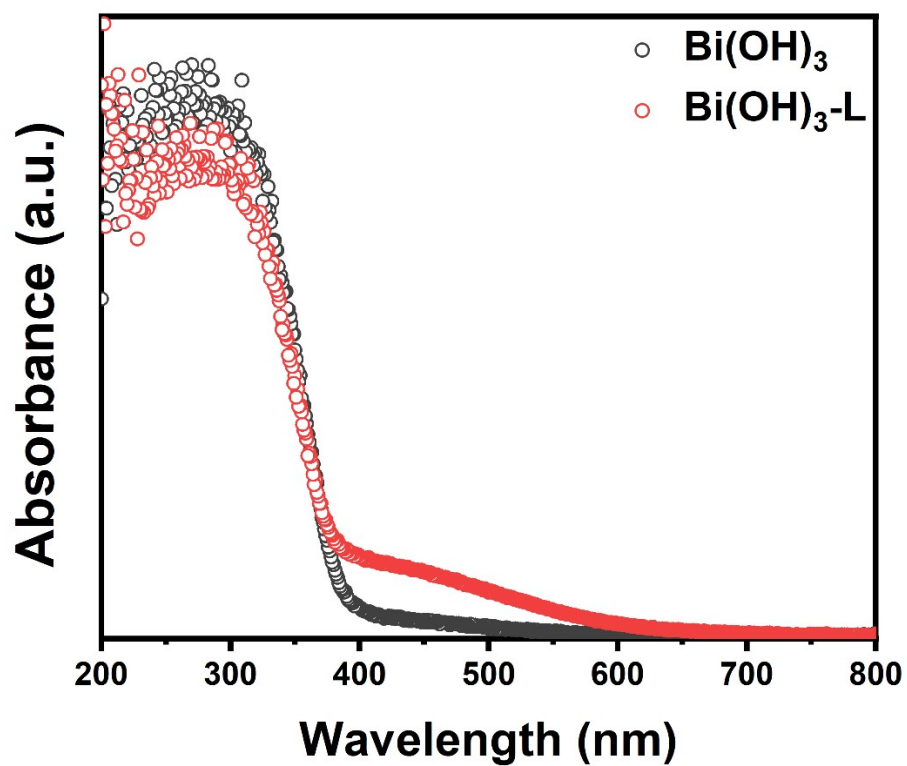

Fig. S4 UV-vis DRS spectra of  $\text{Bi(OH)}_3$  before and after illumination ( $\text{Bi(OH)}_3\text{-L}$ ).

S2.5 Tauc plots and VB-XPS spectra

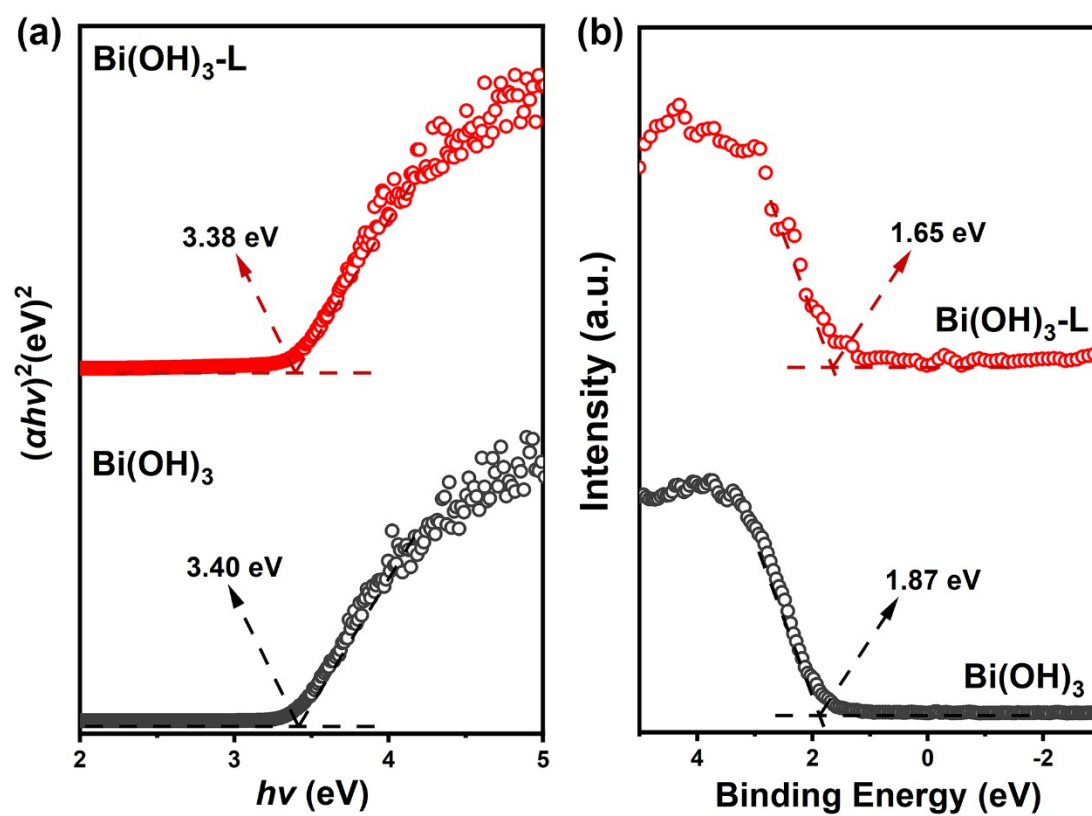

Fig. S5 (a) Tauc plots and (b) VB-XPS spectra of  $\text{Bi(OH)}_3$  before and after illumination.

### S2.6 Photocurrent response

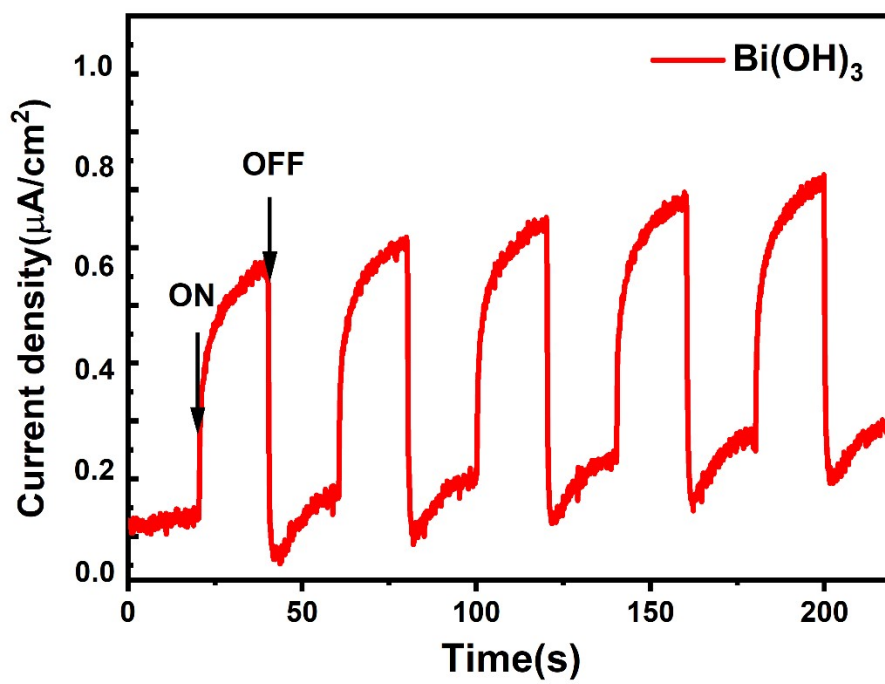

Fig. S6 Photocurrent response of  $\text{Bi(OH)}_3$ .

### S2.7 Thermal Stability

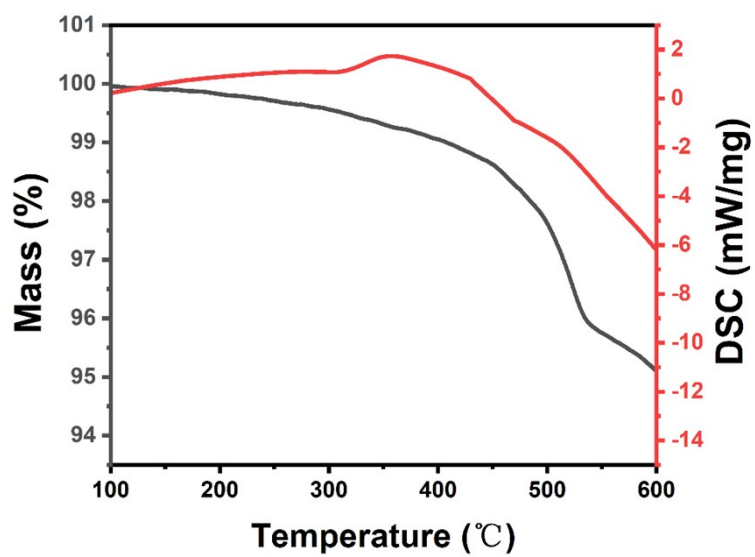

Fig. S7 Thermogravimetric (TG) curve of  $\text{Bi}(\text{OH})_3$  under air atmosphere.

## S2.8 Control experiments

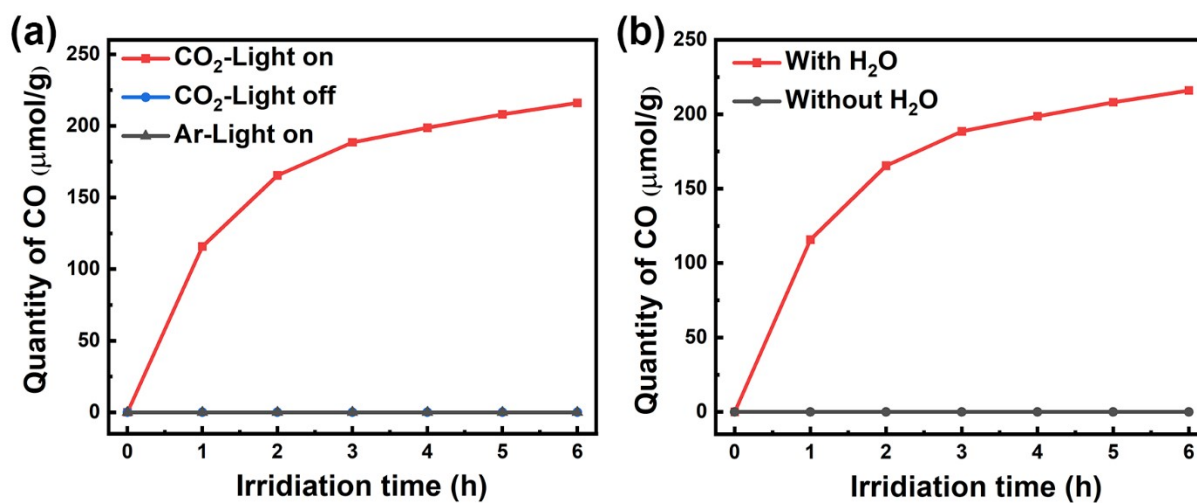

*Fig. S8 Photoreduction of CO<sub>2</sub> into CO over Bi(OH)<sub>3</sub> under different conditions: (a) with and without light irradiation under CO<sub>2</sub>/H<sub>2</sub>O and under Ar/H<sub>2</sub>O vapor flow and light irradiation; (b) with and without H<sub>2</sub>O in CO<sub>2</sub> atmosphere under light irradiation.*

S2.9 MS spectra of  $^{13}\text{CO}_2$

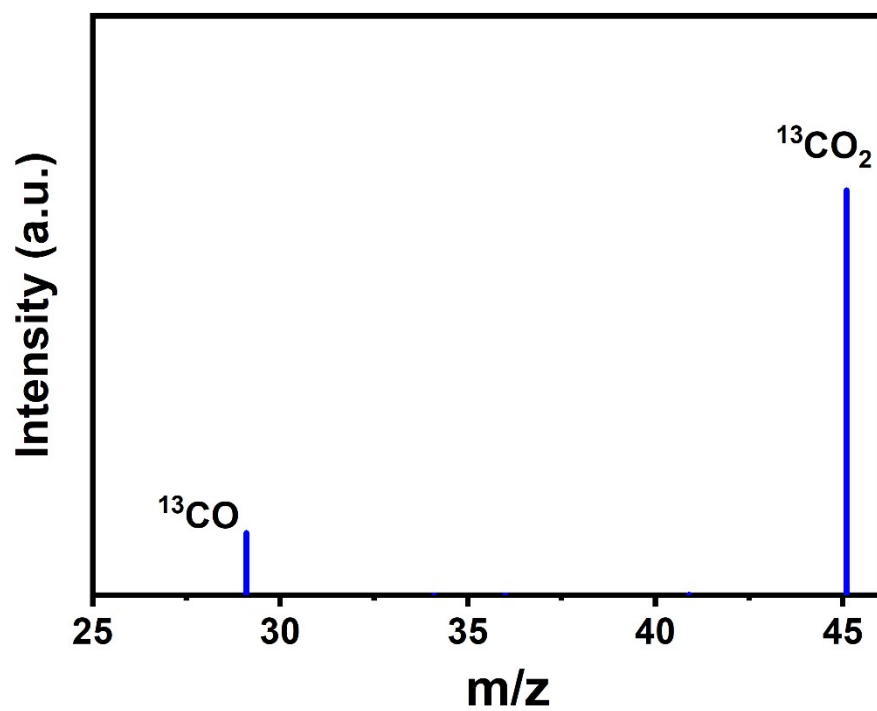

Fig. S9 MS analysis for CO produced from  $^{13}\text{CO}_2$  isotope experiment.

*S2.10 H<sub>2</sub> production*

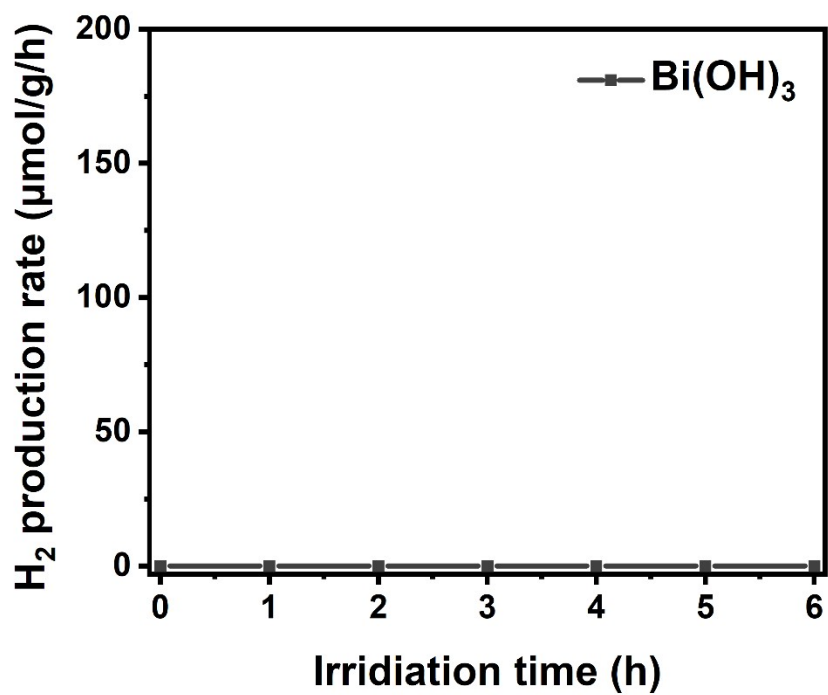

*Fig. S10 Photocatalytic H<sub>2</sub> yields of Bi(OH)<sub>3</sub>.*

S2.11 CO<sub>2</sub> photoreduction of Bi<sub>2</sub>O<sub>3</sub>

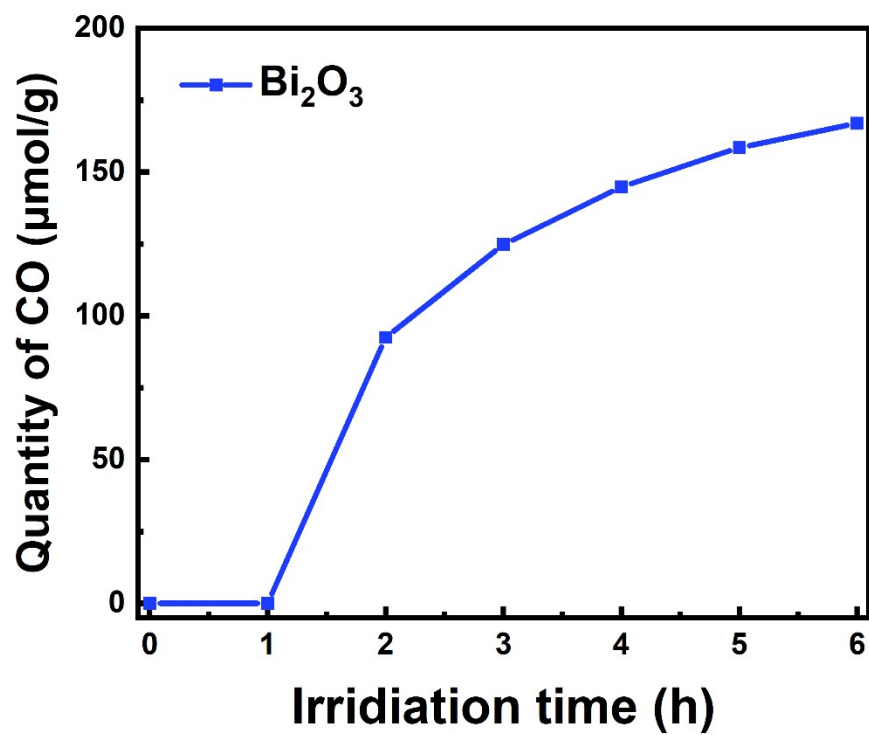

Fig. S11 Photocatalytic CO yields of Bi<sub>2</sub>O<sub>3</sub>.



S2.12 CO<sub>2</sub>-TPD

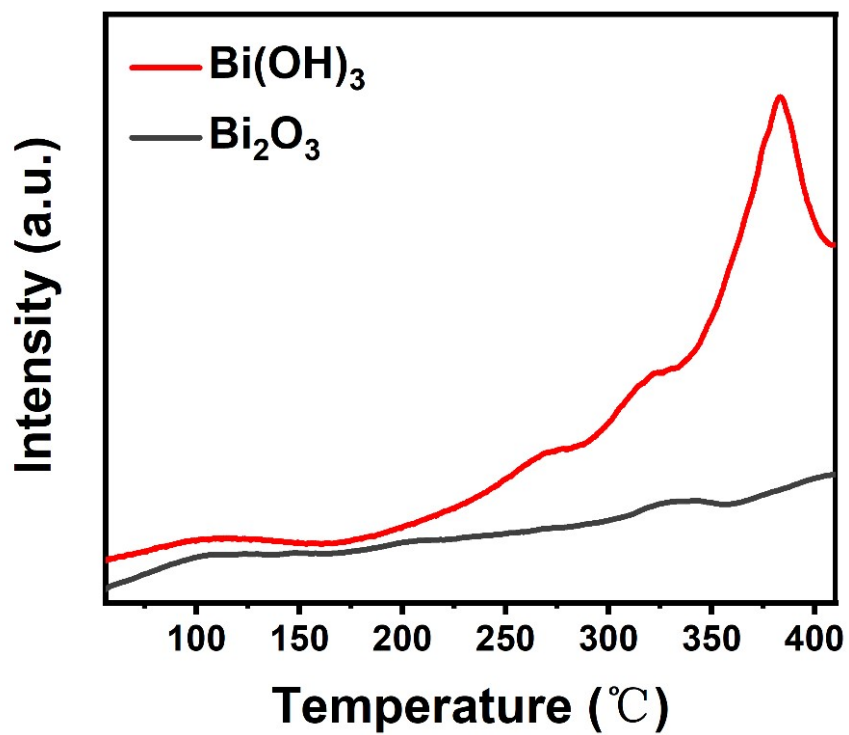

*Fig. S12 CO<sub>2</sub>-TPD of Bi(OH)<sub>3</sub> and Bi<sub>2</sub>O<sub>3</sub>.*

*S2.13 TOC removal*

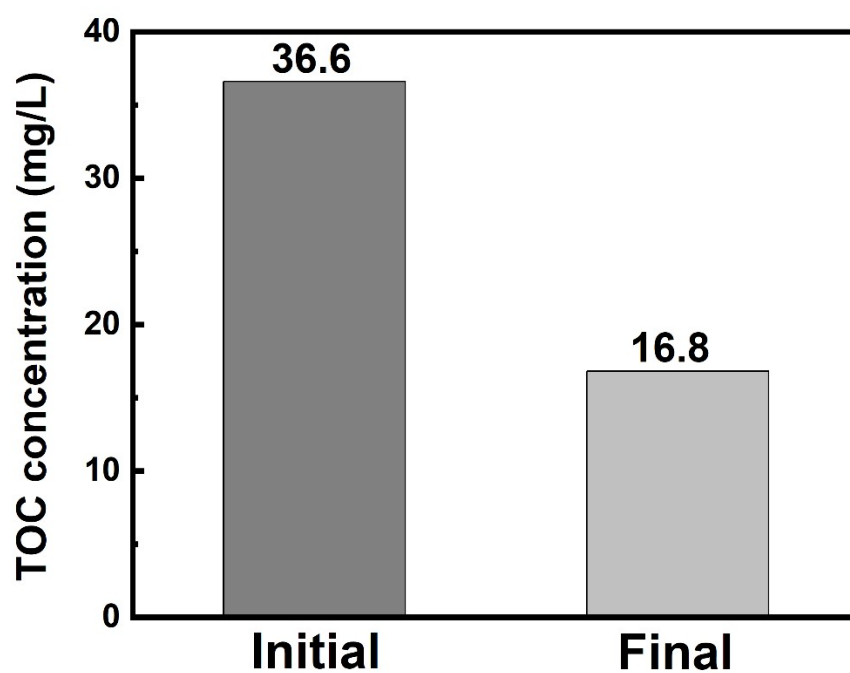

*Fig. S13 TOC change in photodegradation 10 mg/L phenol over  $\text{Bi}(\text{OH})_3$  (catalyst dosage: 0.5g/L).*

*S2.14 Phenol degradation of  $\text{Bi}_2\text{O}_3$*

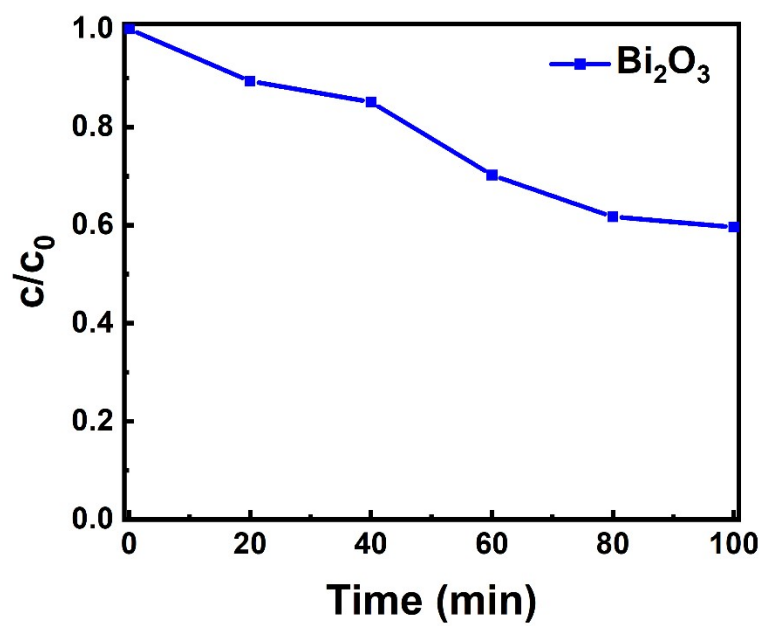

*Fig. S14. Photodegradation of 10 mg/L phenol over  $\text{Bi}_2\text{O}_3$ .*

*S2.15 Photodegradation of dyes*

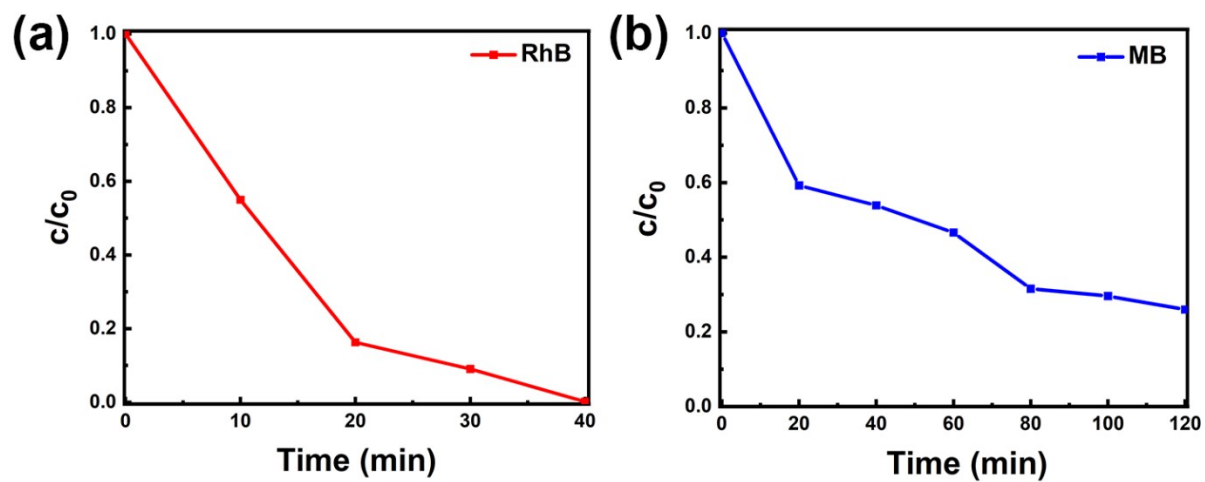

*Fig. S15 Photodegradation of 10 mg/L (a) RhB and (b) MB under 300 W Xe lamp.*

## S2.16 Zeta potential

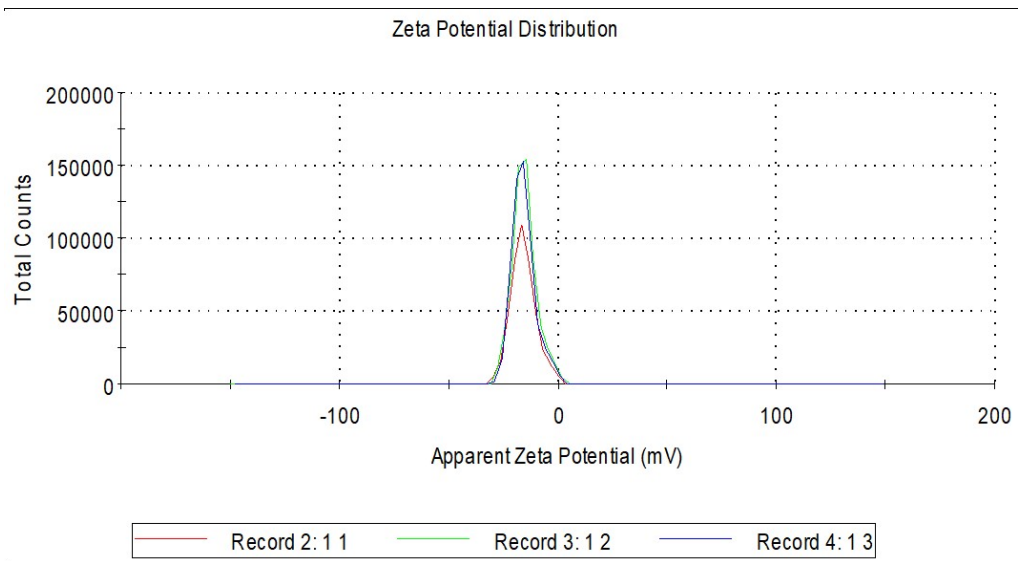

**Fig. S16 Zeta potential of  $\text{Bi}(\text{OH})_3$ .**

## S2.17 Radical species

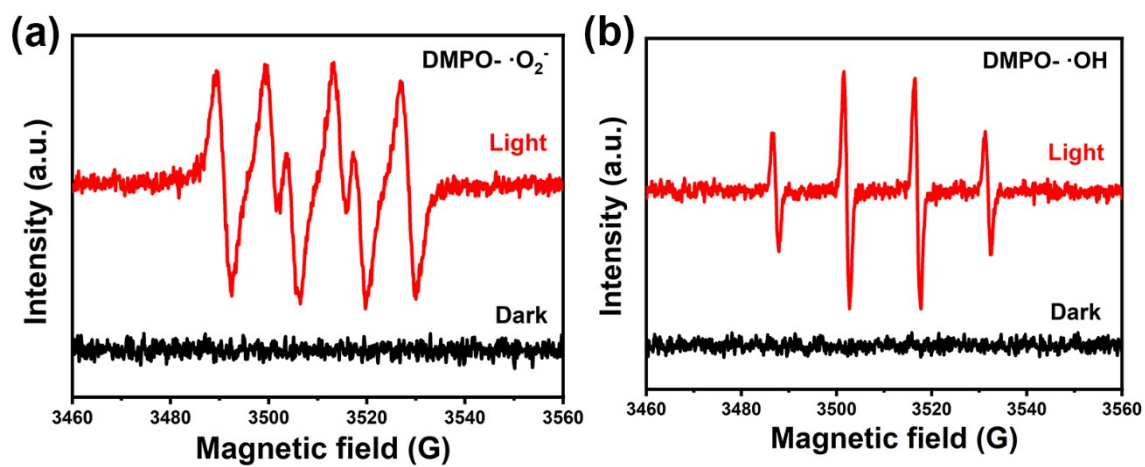

Fig. S17 ESR spectra of radical species trapped by 5, 5-dimethyl-1-pyrroline-N-oxide (DMPO) after 10 min light irradiation with (c) methanol and (d) aqueous dispersion.

## S2.18 Comparable table of photocatalytic performance

Table S1 Summary of photocatalysts for CO<sub>2</sub> reduction

| Catalyst                                                                       | Light source                                    | Activity ( $\mu\text{mol g}^{-1} \text{h}^{-1}$ )                        | Ref.             |
|--------------------------------------------------------------------------------|-------------------------------------------------|--------------------------------------------------------------------------|------------------|
| <b>Bi(OH)<sub>3</sub></b>                                                      | <b>300 W Xe lamp</b>                            | <b>CO: 36</b>                                                            | <b>This work</b> |
| TiO <sub>2</sub> @CTF-Py                                                       | 300 W Xe lamp<br>( $\lambda > 320 \text{ nm}$ ) | CO: 43.34                                                                | [1]              |
| CNFs/TiO <sub>2</sub> NCs                                                      | Simulated sunlight                              | CO: 0.4                                                                  | [2]              |
| ZnO                                                                            | 300 W Xe lamp                                   | CO: 0.75<br>CH <sub>4</sub> : 0.04                                       | [3]              |
| ZnO/graphene                                                                   | 300 W Xe lamp                                   | CO: 3.38<br>CH <sub>3</sub> OH: 0.59                                     | [4]              |
| OVs-Rich BiOBr<br>Atomic Layers                                                | 300 W Xe lamp                                   | CO: 2.03                                                                 | [5]              |
| g-C <sub>3</sub> N <sub>4</sub> /BiOCl                                         | 300 W Xe lamp                                   | CO: 28.4<br>CH <sub>4</sub> : 4.6                                        | [6]              |
| Bi <sub>2</sub> O <sub>3-x</sub>                                               | 940 nm LED light                                | CO: 4.6                                                                  | [7]              |
| Bi <sub>2</sub> O <sub>3</sub>                                                 | 300 W Xe lamp<br>( $\lambda > 400 \text{ nm}$ ) | CO: 17.39                                                                | [8]              |
| Nanosheet/Bi <sub>2</sub> WO <sub>6</sub>                                      | 300 W Xe lamp                                   | CO: 41.5                                                                 | [9]              |
| 3D Bi <sub>2</sub> MoO <sub>6</sub><br>microspheres                            | 300 W Xe lamp                                   | CO: 14.38                                                                | [10]             |
| Bi <sub>2</sub> MoO <sub>6</sub> nanosheets                                    | 500 W Xe lamp                                   | CO: 0.62                                                                 | [11]             |
| Zn-Al layered double<br>hydroxides                                             | 500 W Xe lamp                                   | CO: 39.8<br>CH <sub>3</sub> OH: 8.8                                      | [12]             |
| Ag <sub>3</sub> PO <sub>4</sub> /g-C <sub>3</sub> N <sub>4</sub>               | 300 W Xe lamp<br>( $\lambda > 400 \text{ nm}$ ) | CO: 39.8<br>CH <sub>3</sub> OH: 8.8<br>CO: 45.6<br>CH <sub>4</sub> : 5.6 | [13]             |
| g-C <sub>3</sub> N <sub>4</sub> /Bi <sub>4</sub> O <sub>5</sub> I <sub>2</sub> | 300 W Xe lamp<br>( $\lambda > 380 \text{ nm}$ ) | CO: 6.67<br>CH <sub>4</sub> : 0.92                                       | [14]             |
| g-C <sub>3</sub> N <sub>4</sub> /BiOBr                                         | 300 W Xe lamp<br>( $\lambda > 420 \text{ nm}$ ) | CO: 16<br>CH <sub>4</sub> : 2.5                                          | [15]             |
| Bi <sub>2</sub> WO <sub>6</sub> /RGO/g-C <sub>3</sub> N <sub>4</sub>           | Simulated sunlight                              | CO: 2.37                                                                 | [16]             |

|                                |               |          |      |
|--------------------------------|---------------|----------|------|
|                                | (300 W Xe)    |          |      |
| O and C codoped g-             | 300 W Xe lamp | CO: 4.6  | [17] |
| C <sub>3</sub> N <sub>4</sub>  | (λ > 420 nm)  |          |      |
| In <sub>2</sub> O <sub>3</sub> | Visible light | CO: 63.3 | [18] |
|                                | (λ > 420 nm)  |          |      |

---



*Table S2 Summary of photocatalysts for organic pollutions degradation*

| Catalyst                                           | Light source                        | Initial concentration      | Degradation activities | Degradation Time | Ref.             |
|----------------------------------------------------|-------------------------------------|----------------------------|------------------------|------------------|------------------|
| <b>Bi(OH)<sub>3</sub></b>                          | <b>300 W Xe lamp</b>                | <b>Phenol (10 mg/L)</b>    | <b>92.7%</b>           | <b>180 min</b>   | <b>This work</b> |
|                                                    |                                     | <b>RhB (10 mg/L)</b>       | <b>100%</b>            | <b>40 min</b>    |                  |
| Pt/TiO <sub>2</sub>                                | High pressure mercury lamp          | Phenol (0.43 mM)           | ~92%                   | 90 min           | [19]             |
| Tm-modified TiO <sub>2</sub>                       | Visible light ( $\lambda > 420$ nm) | Phenol (0.21 mM)           | ~86%                   | 60 min           | [20]             |
| BiOBr/Bismuth Oxyhydrate                           | UV-vis light                        | RhB (15 ppm)               | 100%                   | 50 min           | [21]             |
| Pd/Bi <sub>2</sub> MoO <sub>6</sub>                | Visible light                       | RhB (1×10 <sup>-5</sup> M) | 97.35%                 | 150 min          | [22]             |
| Ag <sub>2</sub> O/Bi <sub>2</sub> MoO <sub>6</sub> | Visible light ( $\lambda > 420$ nm) | RhB (10 mg/L)              | 95%                    | 60 min           | [23]             |
| ZnO/ZnMgAl-CO <sub>3</sub> -LDHs                   | 12 W UV lamp ( $\lambda = 254$ nm)  | Phenol (10 mg/L)           | 98%                    | 3 h              | [24]             |
| CeO <sub>2</sub> /Mg-Al LDH                        | UV light                            | Phenol (0.85 mM)           | 50%                    | 7 h              | [25]             |
| Pd-BiOBr                                           | Visible light                       | Phenol (10 mg/L)           | 95.1%                  | 180 min          | [26]             |
| Carbon quantum dots/BiOBr                          | 300 W Xe lamp ( $\lambda > 420$ nm) | RhB (10 mg/L)              | 50%                    | 50 min           | [27]             |
| Bi <sub>2</sub> O <sub>3</sub> @BiOI@UiO-66        | Visible light                       | RhB (10 mg/L)              | 89.9%                  | 60 min           | [28]             |
| FeOOH/Bi <sub>2</sub> O <sub>3</sub>               | 300 W Xe lamp                       | Phenol (20 mg/L)           | 85%                    | 160 min          | [29]             |

## S4. References

1. Z. Xu, Y. Cui, D. J. Young, J. Wang, H.-Y. Li, G.-Q. Bian and H.-X. Li, *Journal of CO<sub>2</sub> Utilization*, 2021, **49**, 101561.
2. Z. Lei, Z. Xiong, Y. Wang, Y. Chen, D. Cao, Y. Zhao, J. Zhang and C. Zheng, *Catalysis Communications*, 2018, **108**, 27-32.
3. P. Li, H. Hu, G. Luo, S. Zhu, L. Guo, P. Qu, Q. Shen and T. He, *ACS Applied Materials & Interfaces*, 2020, **12**, 56039-56048.
4. L. Wang, H. Tan, L. Zhang, B. Cheng and J. Yu, *Chemical Engineering Journal*, 2021, **411**, 128501.
5. L. Wang, G. Liu, B. Wang, X. Chen, C. Wang, Z. Lin, J. Xia and H. Li, *Solar RRL*, 2021, **5**, 2000480.
6. Y. Chen, F. Wang, Y. Cao, F. Zhang, Y. Zou, Z. Huang, L. Ye and Y. Zhou, *ACS Applied Energy Materials*, 2020, **3**, 4610-4618.
7. Y. Li, M. Wen, Y. Wang, G. Tian, C. Wang and J. Zhao, *Angewandte Chemie*, 2021, **133**, 923-929.
8. Z. Xie, Y. Xu, D. Li, S. Meng, M. Chen and D. Jiang, *ACS Applied Energy Materials*, 2020, **3**, 12194-12203.
9. X. Zhang, G. Ren, C. Zhang, R. Li, Q. Zhao and C. Fan, *Catalysis Letters*, 2020, **150**, 2510-2516.
10. S. Li, L. Bai, N. Ji, S. Yu, S. Lin, N. Tian and H. Huang, *Journal of Materials Chemistry A*, 2020, **8**, 9268-9277.
11. N. Ahmed, Y. Shibata, T. Taniguchi and Y. Izumi, *Journal of Catalysis*, 2011, **279**, 123-135.
12. Y. He, L. Zhang, B. Teng and M. Fan, *Environmental Science & Technology*, 2015, **49**, 649-656.
13. Y. Bai, L. Ye, L. Wang, X. Shi, P. Wang, W. Bai and P. K. Wong, *Applied Catalysis B: Environmental*, 2016, **194**, 98-104.
14. Y. Bai, T. Chen, P. Wang, L. Wang, L. Ye, X. Shi and W. Bai, *Sol. Energy Mater. Sol. Cells*, 2016, **157**, 406-414.
15. W.-K. Jo, S. Kumar, S. Eslava and S. Tonda, *Applied Catalysis B: Environmental*, 2018, **239**, 586-598.
16. B. Liu, L. Ye, R. Wang, J. Yang, Y. Zhang, R. Guan, L. Tian and X. Chen, *ACS applied materials & interfaces*, 2018, **10**, 4001-4009.
17. S. Wan, M. Ou, X. Wang, Y. Wang, Y. Zeng, J. Ding, S. Zhang and Q. Zhong, *Dalton Transactions*, 2019, **48**, 12070-12079.
18. X. Zhu, J. Yang, X. Zhu, J. Yuan, M. Zhou, X. She, Q. Yu, Y. Song, Y. She, Y. Hua, H. Li and H. Xu, *Chemical Engineering Journal*, 2021, **422**, 129888.
19. Y. Wang, J. Zhao, X. Xiong, S. Liu and Y. Xu, *Applied Catalysis B: Environmental*, 2019, **258**, 117903.
20. P. Mazierski, P. N. Arellano Caicedo, T. Grzyb, A. Mikołajczyk, J. K. Roy, E. Wyrzykowska, Z. Wei, E. Kowalska, T. Puzyn, A. Zaleska-Medynska and J. Nadolna, *Applied Catalysis B: Environmental*, 2019, **252**, 138-151.

21. S. Shenawi-Khalil, V. Uvarov, S. Fronton, I. Popov and Y. Sasson, *The Journal of Physical Chemistry C*, 2012, **116**, 11004-11012.
22. A. Phuruangrat, T. Klangnoi, P. Patiphatpanya, P. Dumrongrojthanath, S. Thongtem and T. Thongtem, *J. Electron. Mater.*, 2020, **49**, 3684-3691.
23. J. Zhang, H. Liu and Z. Ma, *Journal of Molecular Catalysis A: Chemical*, 2016, **424**, 37-44.
24. S.-Z. Wu, N. Li and W.-D. Zhang, *J. Porous Mater.*, 2014, **21**, 157-164.
25. J. S. Valente, F. Tzompantzi and J. Prince, *Applied Catalysis B: Environmental*, 2011, **102**, 276-285.
26. X. Meng, Z. Li and Z. Zhang, *Materials Research Bulletin*, 2018, **99**, 471-478.
27. J. Xia, J. Di, H. Li, H. Xu, H. Li and S. Guo, *Applied Catalysis B: Environmental*, 2016, **181**, 260-269.
28. J. Tang, T. Zhang, Z. Duan, C. Li, C. Meng, Y. Zhang, Q. Zhang, D. Hou, Q. Xv and Y. Zhu, *Chem. Phys. Lett.*, 2021, **768**, 138354.
29. D. He, X. Wu, Y. Chen, Y. Situ, L. Zhong and H. Huang, *Chemosphere*, 2018, **210**, 334-340.
